# Supplementary material for: Redox and complexation chemistry of the CrVI/CrV/CrIV-d-glucuronic acid system
Source: Royal Society of Chemistry journal article supplement (doi:10.1039/b915652f), 2010-01-01
Supplement: b915652f.pdf [file b915652f.pdf]

Figure S1: Experimental X-band EPR spectra of Mixtures Glucur/Cr<sup>VI</sup> at (a) 10 min, (b) 1.0 h, [Glucur] = 1.0 M, pH = 1.0; [Cr<sup>VI</sup>] = 0.48 mM; Mod. Amp = 2.0 G, Sweep Width = 1000.0 G; T = 20.0°C, I = 1.0 M, F  $\approx$  9.7 MHz

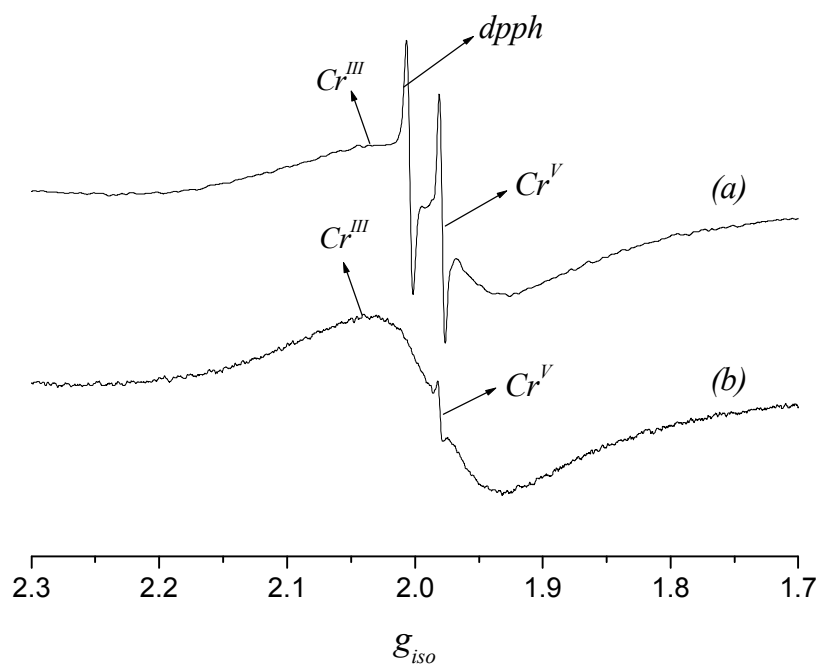

Figure S2: Difference spectra from the reaction of 0.13 M Glucur with  $6.5 \times 10^{-4}$  mM  $\text{Cr}^{\text{VI}}$  and 0.150 mM  $\text{Fe}^{2+}$  at  $[\text{HClO}_4] = 0.1$  M,  $I = 1.0$  M,  $[\text{O}_2] = 1.26$  mM and  $T = 25^\circ\text{C}$ . The  $\text{Fe}^{2+}$  was added after reaction Glucur/ $\text{Cr}^{\text{VI}}$  was complete as a reagent for  $\text{CrO}_2^{2+}$  (a) spectrum before the addition of  $\text{Fe}^{2+}$  (b) spectra after the addition of  $\text{Fe}^{2+}$ . Inset: the spectral changes shown represent the absorbance differences ( $\Delta\text{Abs}$ ) before and immediately after the addition of  $\text{Fe}^{2+}$ .

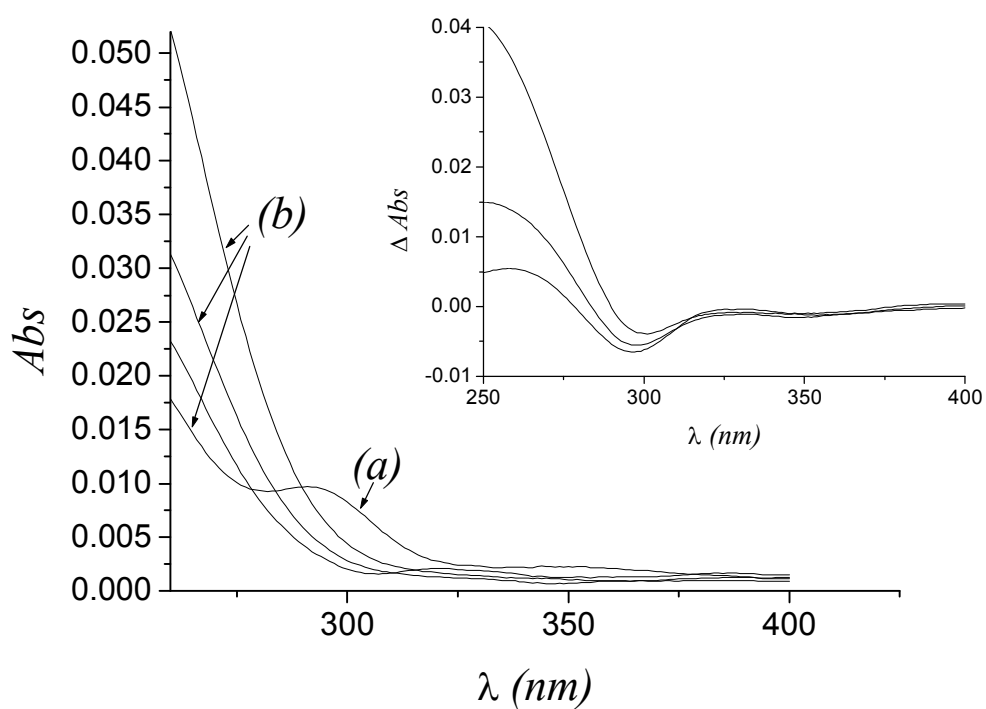

Figure S3: disproportionation of  $\text{Cr}^{\text{IV}}$  in absence of Glucur,  $T = 15^\circ\text{C}$ ,  $I = 1.0$  and  $[\text{H}^+] = 0.20$ ,  $[\text{Cr}^{\text{IV}}] = 0.07 \text{ mM}$

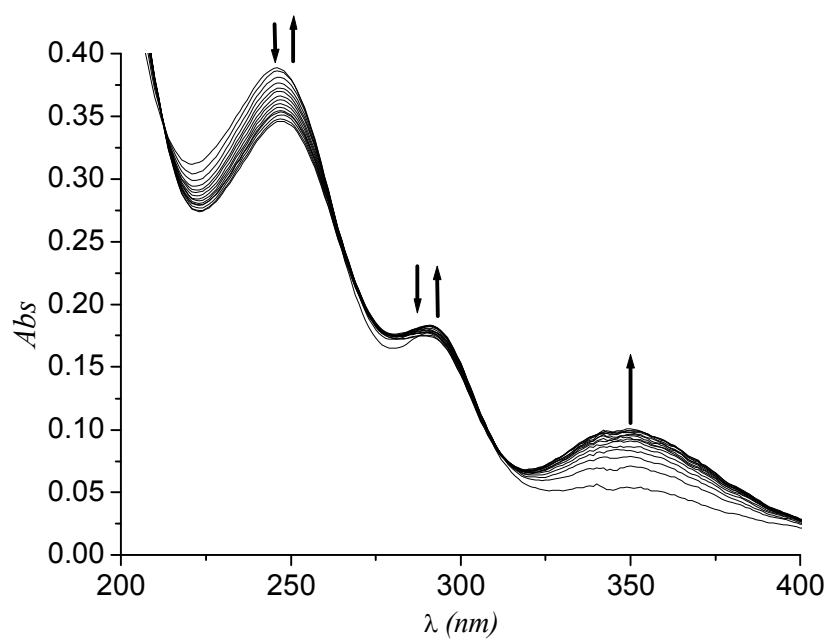

Figure S4

uv-vis spectra of Glucur/Cr<sup>VI</sup> mixture showing Cr<sup>III</sup> species.

[Glucur] = 0.80M, [HClO<sub>4</sub>] = 0.4 M, [Cr<sup>VI</sup>] = 6.0 mM, I = 1.0, T = 33°C: (a) 15 min , (b) 40 min, (c) 75 min and (d) 24 h.

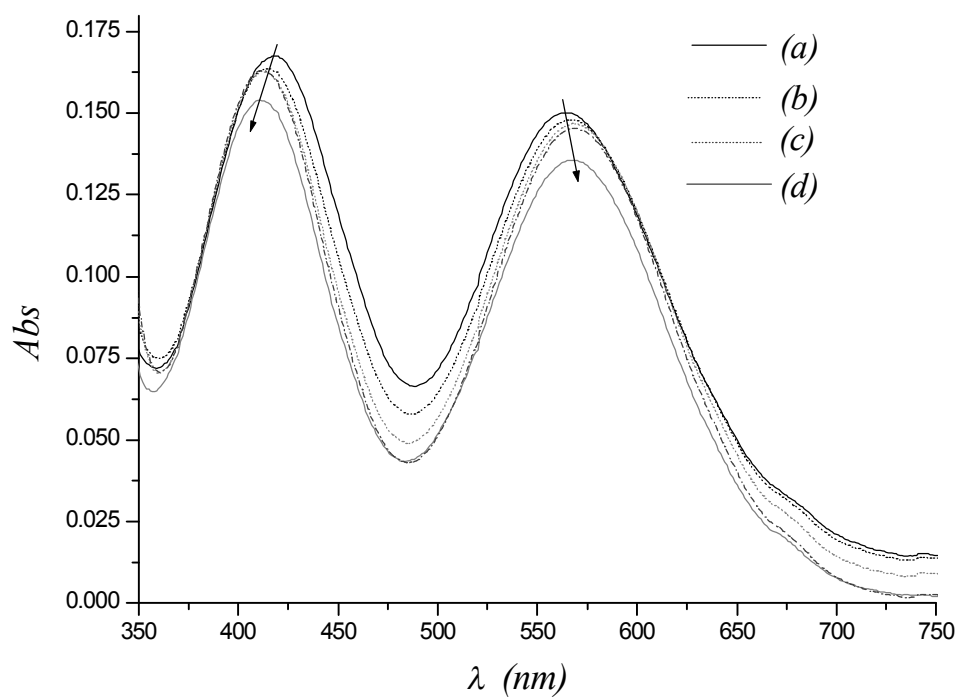

Figure S5: Time evolution of the UV-vis spectra from Glucur/Cr<sup>VI</sup> mixtures. [Glucur] = 0,72 M; [Cr<sup>VI</sup>] = 6,0 mM; [HClO<sub>4</sub>] = 0,20 M; T = 33°C; I = 1,0 M. Spectra recorded every 2 min; first spectrum taken 10 min after the reaction started.

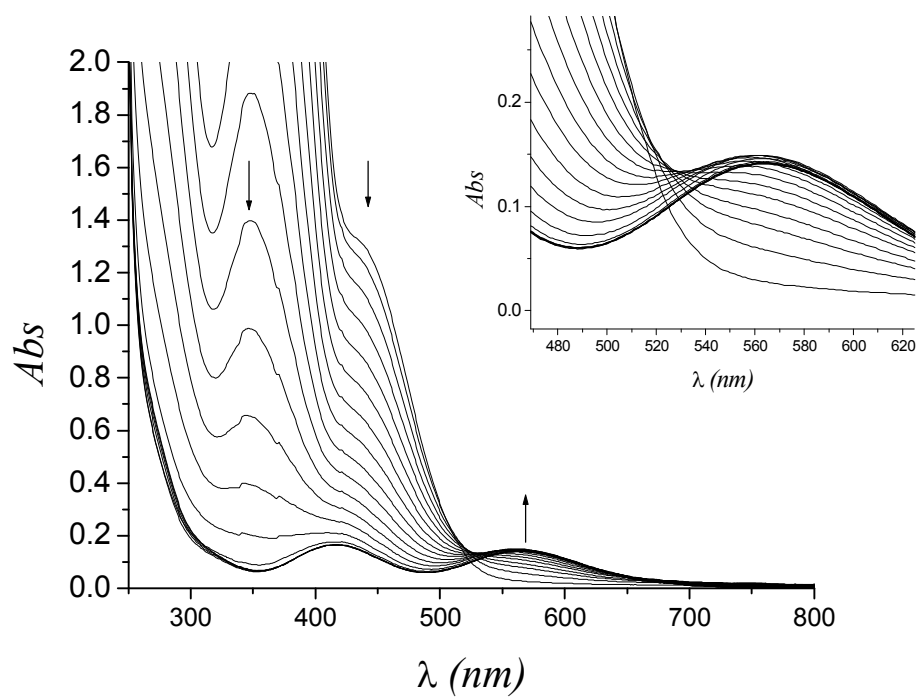

Figure S6: simulated kinetics profiles for Cr species. (a) [Glucur] = 0.18 M,  $[H^+] = 0.2$  M [Cr] calculated using  $k_6 = 0.109 \times 10^{-3} \text{ s}^{-1}$ ,  $k_5 = 0.102 \times 10^{-2} \text{ s}^{-1}$  (b) [Glucur] = 0.42 M,  $[H^+] = 0.96$  M [Cr] calculated using  $k_6 = 0.407 \times 10^{-2} \text{ s}^{-1}$ ,  $k_5 = 0.500 \times 10^{-2} \text{ s}^{-1}$ .  $T = 33^\circ\text{C}$ ;  $I = 1.0$  M;  $[Cr]_T = 0.6$  mM.  $k_6$  and  $k_5$  calculated using Eqs. 7-12.

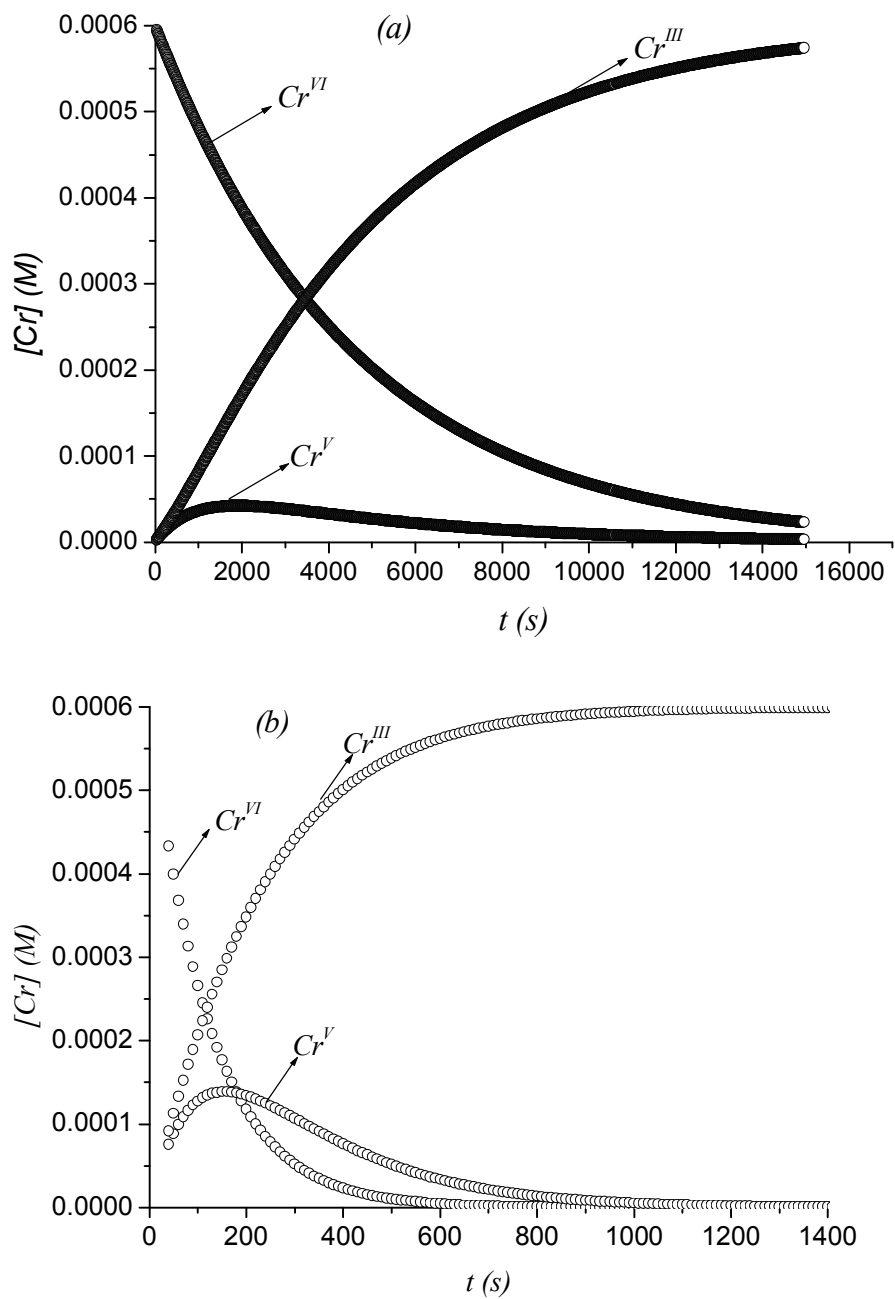

Table S1. lactone concentration in Glucur solutions

| [Glucur] (mM) | HClO <sub>4</sub> (M) | time <sup>a</sup> (h) | lactone (mM) |
|---------------|-----------------------|-----------------------|--------------|
| 180           | 0.2                   | 0.60                  | 4.3          |
| 180           | 1.0                   | 0.20                  | 7.2          |
| 420           | 0.2                   | 0.28                  | 1.9          |
| 420           | 1.0                   | 0.1                   | 3.8          |

<sup>a</sup> time necessary to reduce the initial concentration of Cr<sup>VI</sup> up to 80%.  
I = 1,0 M; T = 33°C.
